# Supplementary material
Source: Elsevier journal article supplement (https://univ-rennes.hal.science/hal-01468025v1/file/mmc5.docx)
Supplement: mmc5 [file mmc5.docx]

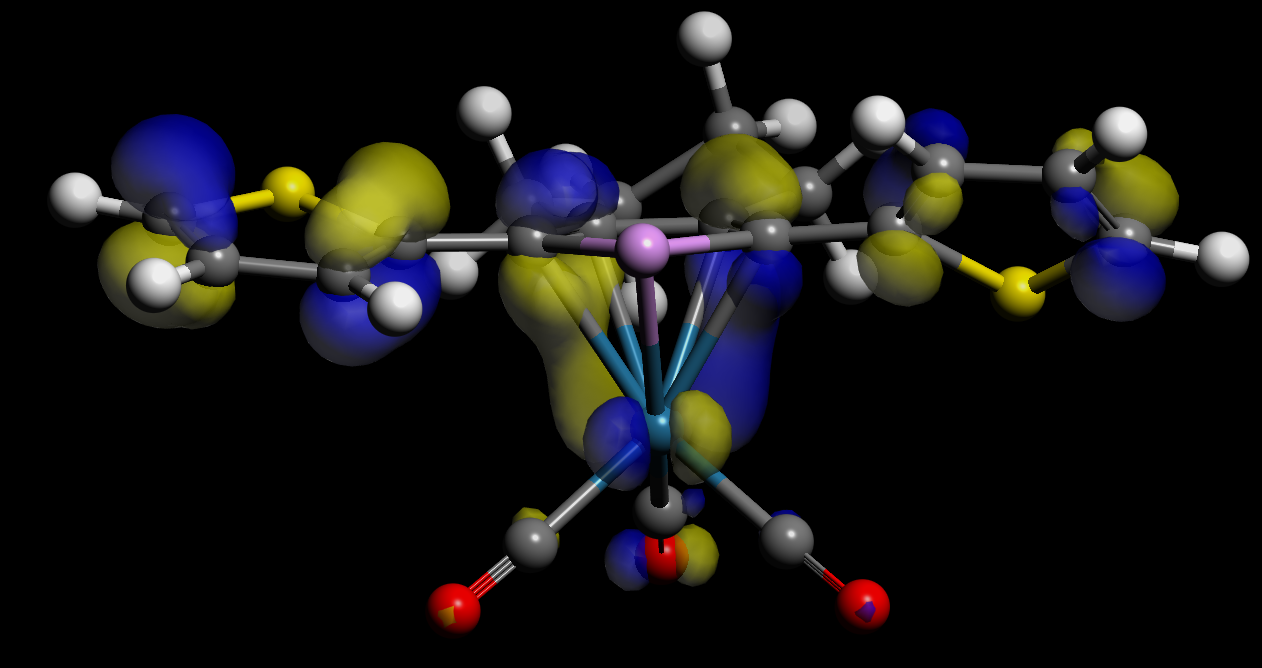


HOMO frontier molecular orbital of the compound **1** depicts the overlapping between the phospholide diene system orbitals and the valence orbital of the metal center.
